# Supplementary material
Source: Springer Nature journal article supplement (https://www.springermedizin.de/resource/supplementary/12970_2013_382_MOESM1_ESM.pdf/9593826)

# 1. Exercise Period (2 weeks)

1. Determination of CP

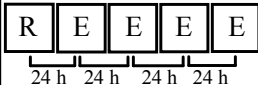

1. Intervention Period

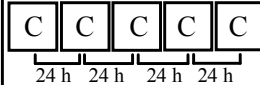

# Washout Period

~ 2 weeks

# 2. Exercise Period (2 weeks)

2. Determination of CP

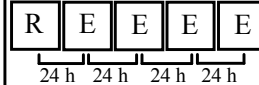

2. Intervention Period

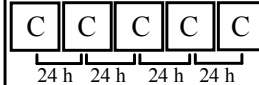

Supplement: MOESM1 [file 9593826]
